# Supplementary figures and images for: N-Acetylcysteine inhibits platelet–monocyte conjugation in patients with type 2 diabetes with depleted intraplatelet glutathione: a randomised controlled trial
Source: Springer Nature journal article supplement (doi:10.1007/s00125-012-2685-z), 2012-08-30

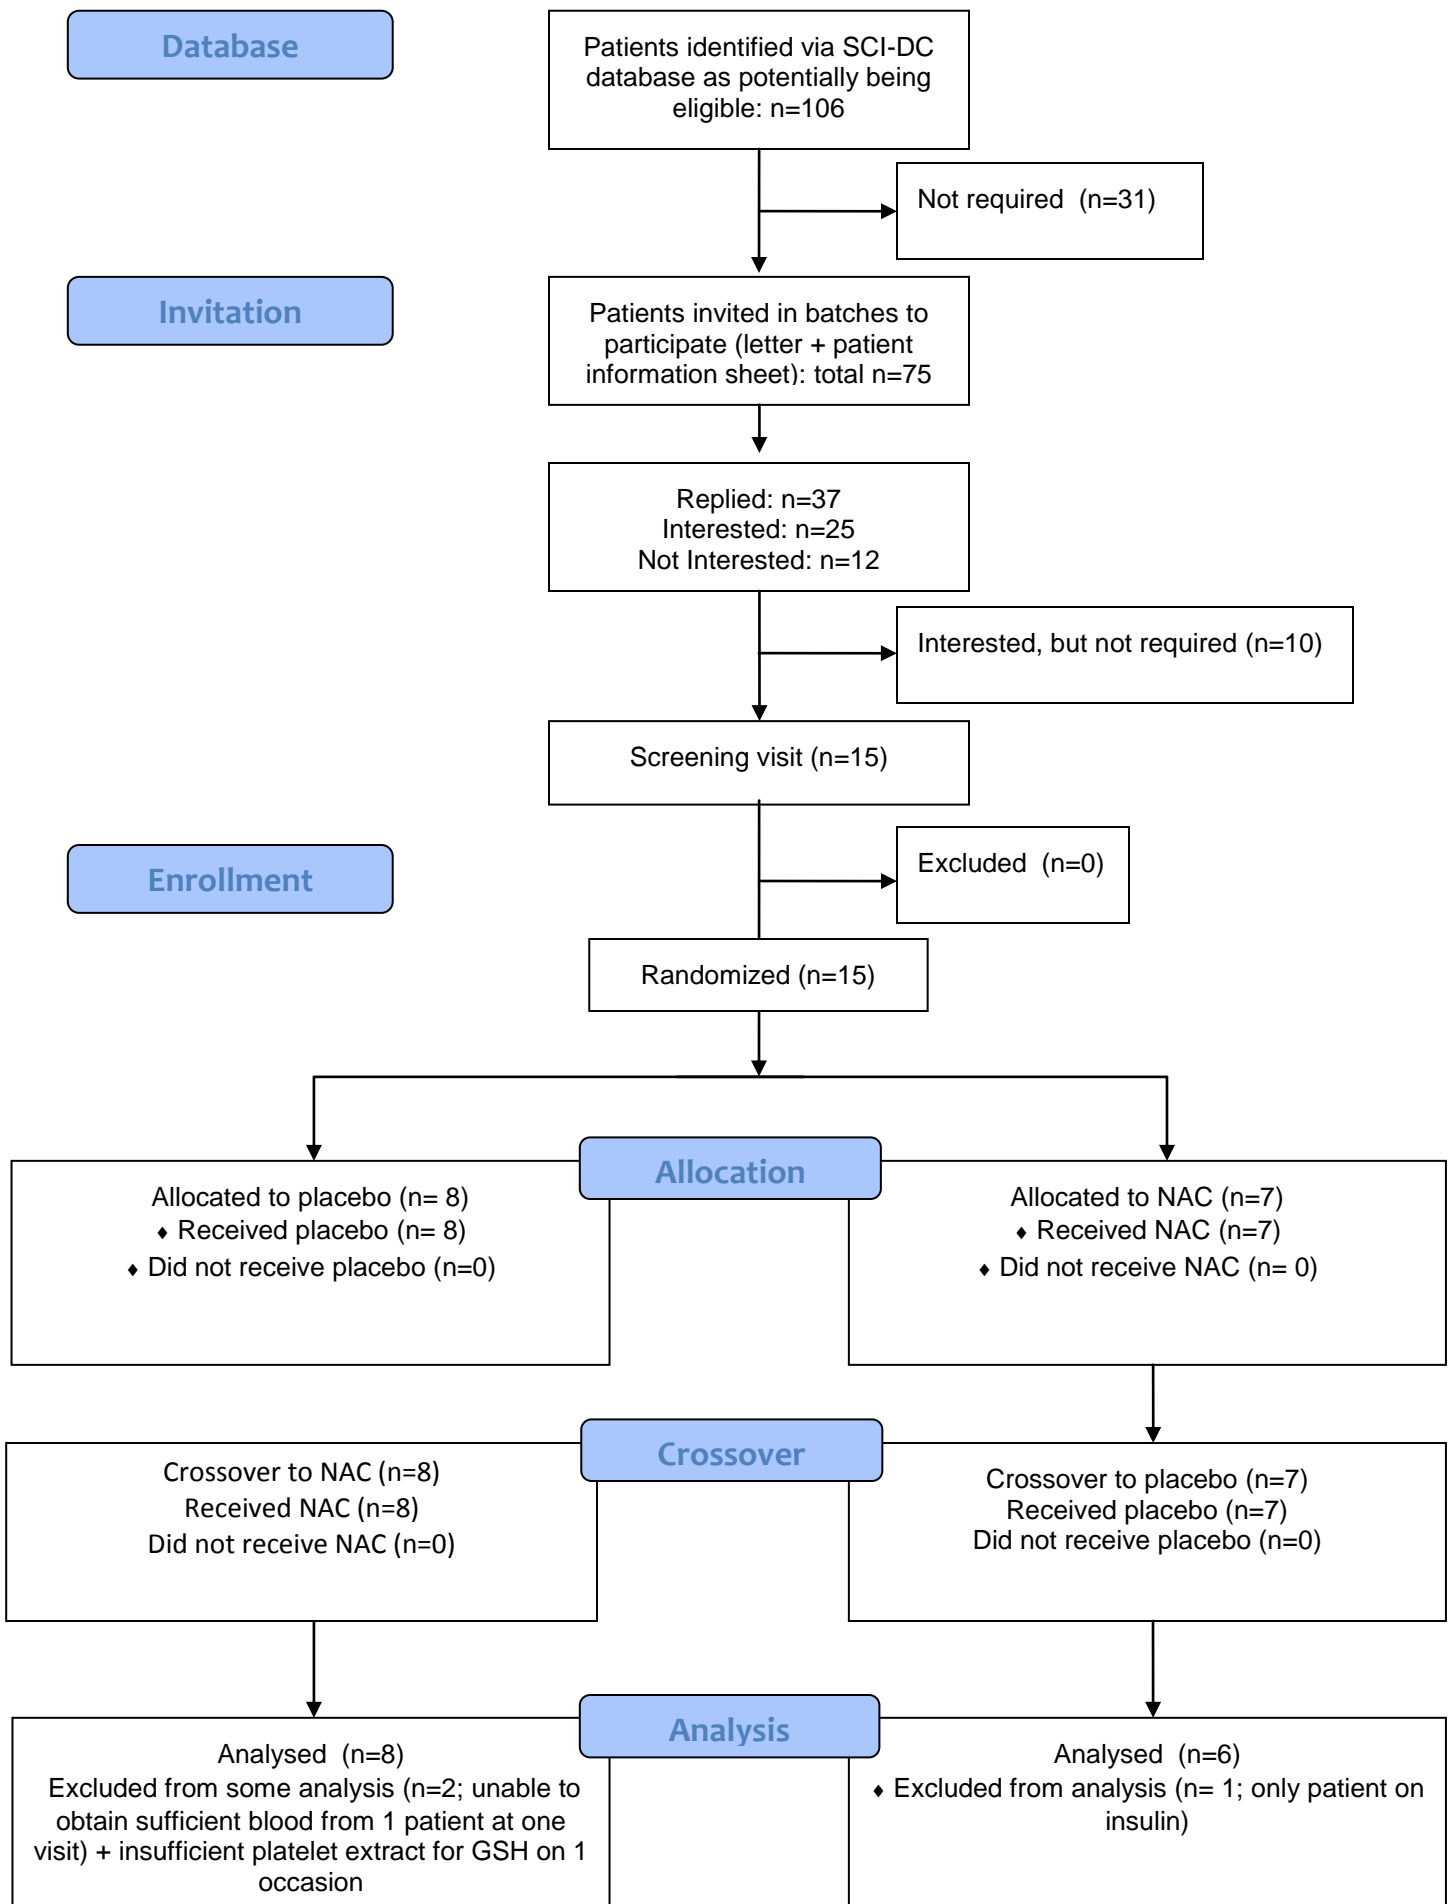

Supplement: MOESM1 [file 8091104]
